# Supplementary material for: Hydrological Response of the Kunhar River Basin in Pakistan to Climate Change and Anthropogenic Impacts on Runoff Characteristics
Source: MDPI journal article supplement (doi:10.3390/w13223163), 2021-11-09
Supplement: s1 [file s1]

Supplementary Material

# Hydrological Response of the Kunhar River Basin in Pakistan to Climate Change and Anthropogenic Impacts on Runoff Characteristics

Muhammad Saifullah <sup>1,\*</sup>, Muhammad Adnan <sup>2</sup>, Muhammad Zaman <sup>3</sup>, Andrzej Wałęga <sup>4</sup>, Shiyin Liu <sup>2,\*</sup>, Muhammad Imran Khan <sup>5</sup>, Alexandre S. Gagnon <sup>6</sup> and Sher Muhammad <sup>7</sup>

<sup>1</sup> Department of Agricultural Engineering, Muhammad Nawaz Shareef University of Agriculture, Multan 66000, Pakistan

<sup>2</sup> Institute of International Rivers and Eco-Security, Yunnan University, Kunming 650500, China; adnan@lzb.ac.cn

<sup>3</sup> Department of Irrigation and Drainage, University of Agriculture, Faisalabad 380000, Pakistan; muhammad.zaman@uaf.edu.pk

<sup>4</sup> Department of Sanitary Engineering and Water Management, University of Agriculture in Krakow, 31-120 Kraków, Poland; andrzej.walega@urk.edu.pl

<sup>5</sup> Research Center of Fluid Machinery Engineering and Technology, Jiangsu University, Zhenjiang 212013, China; imrankhan7792@yahoo.com

<sup>6</sup> School of Biological and Environmental Sciences, Liverpool John Moores University, Liverpool L3 3AF, UK; A.Gagnon@ljmu.ac.uk

<sup>7</sup> International Centre for Integrated Mountain Development (ICIMOD), Lalitpur 44700, Nepal; sher.muhammad@icimod.org

\* Correspondence: muhammad.saifullah@mnsuam.edu.pk (M.S.); shiyin.liu@ynu.edu.cn (S.L.)

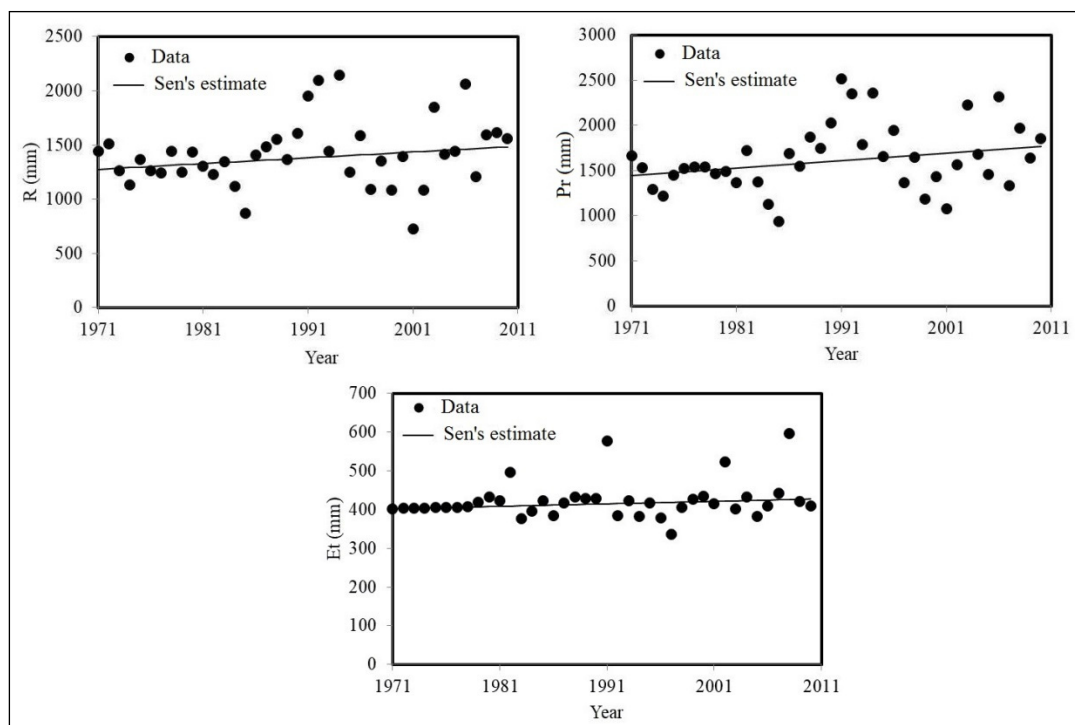

**Figure S1.** MK trend analysis of Runoff (R), Precipitation (Pr), and Evapotranspiration (Et) for whole period (1971–2010)

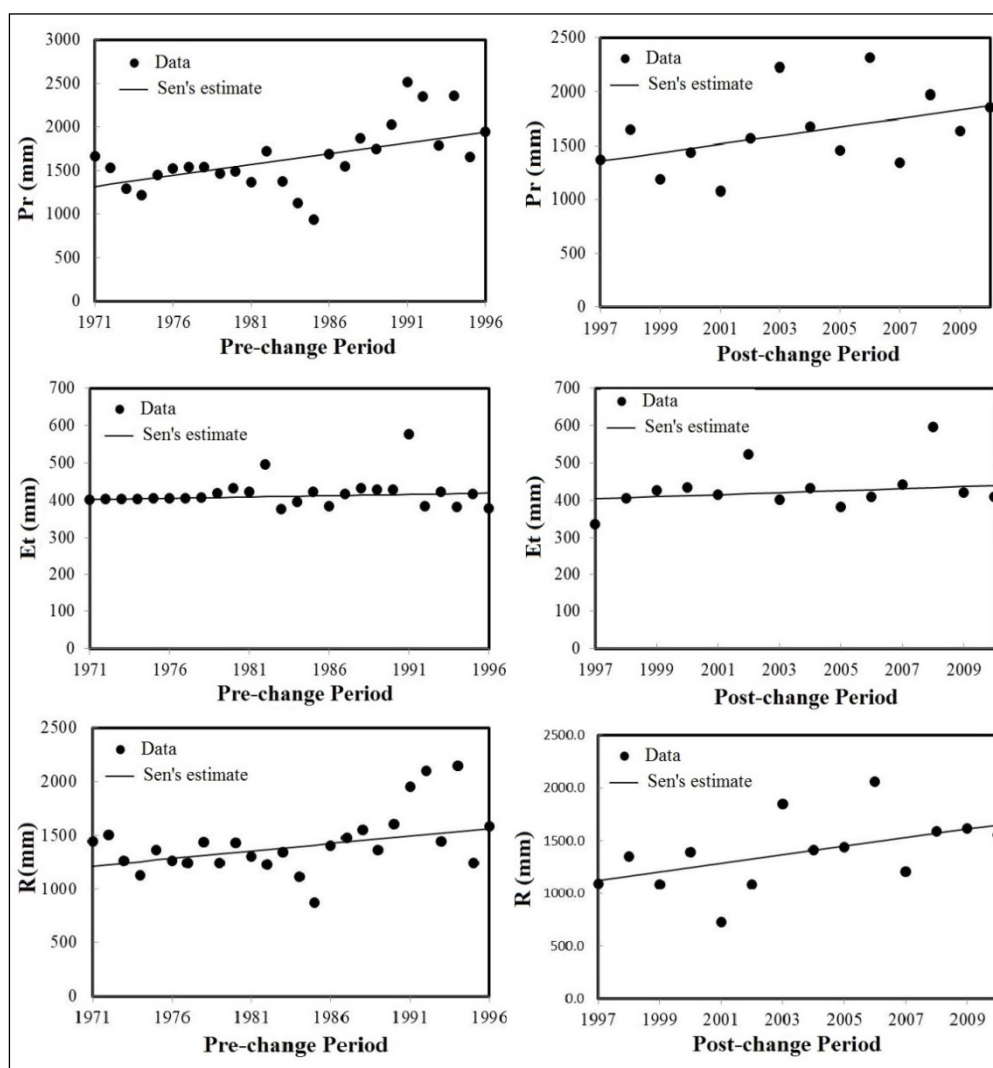

**Figure S2.** MK trend analysis of Precipitation (Pr), Evapotranspiration (Et), and Runoff (R) during pre-change (1971–1996) and post-change (1997–2010) periods

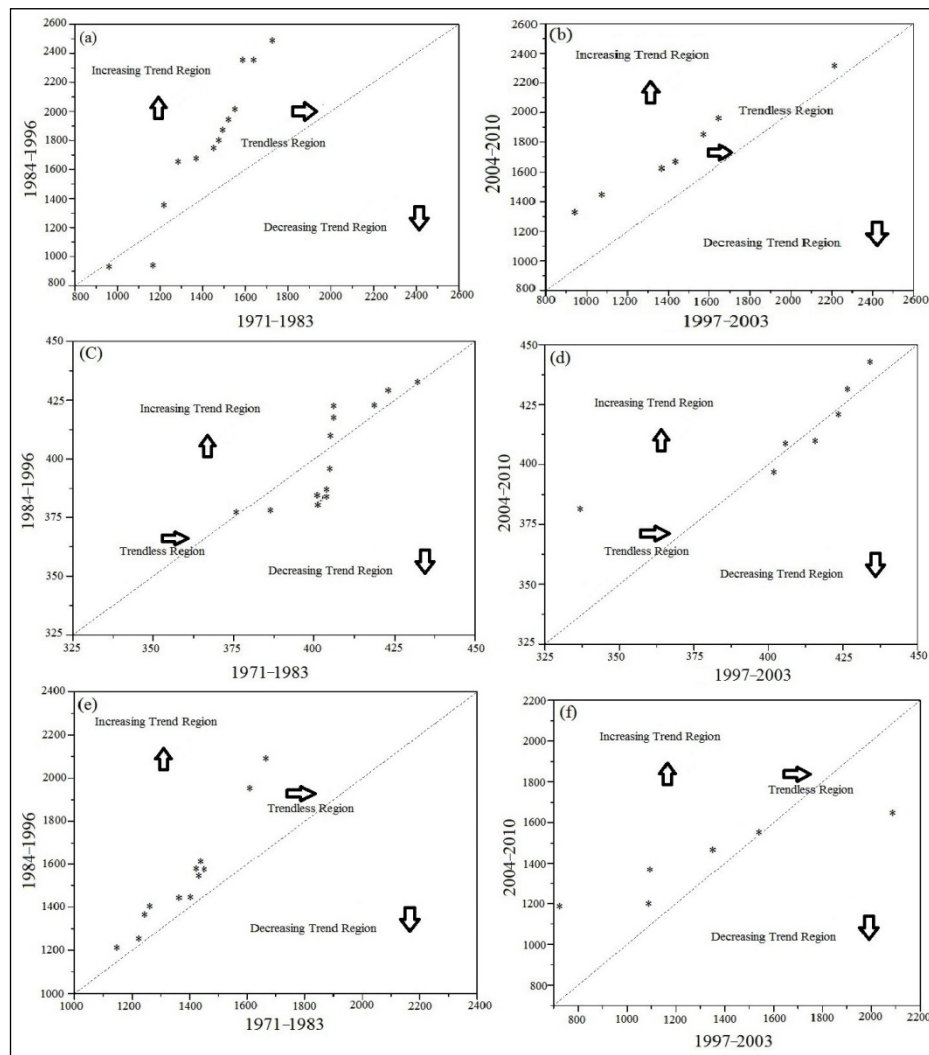

**Figure S3.** ITA of precipitation (a, b), evapotranspiration (c, d), and runoff (e, f) during pre-change (1971–1996), and post-change (1997–2010) periods. Note: \* observed data points
